# Supplementary material
Source: MDPI journal article supplement (https://www.mdpi.com/1424-8247/15/4/390)
Supplement: s1 [file s1]

## Supporting Information for

### *Paeoniflorin alleviates skeletal muscle atrophy in ovariectomized mice through the ER $\alpha$ /NRF1 mitochondrial biogenesis pathway*

Ki-Sun Park <sup>1,\*</sup>, Hyungjun Kim <sup>1</sup>, Hye Jin Kime <sup>2</sup>, Kang In Lee <sup>1</sup>, Seoyoung Lee <sup>1</sup>, Jieun Kim <sup>1</sup>

<sup>1</sup> KM Science Research Division, Korea Institute of Oriental Medicine, Daejeon 34054, Korea

<sup>2</sup> KM Convergence Research Division, Korea Institute of Oriental Medicine, Daejeon 34054, Korea

\* Corresponding: kisunpark@kiom.re.kr

**Table S1. Primers for Quantitative PCR (qPCR).**

| Species | Gene name     |   | Sequence (5' to 3')      | T <sub>m</sub> (°C) |
|---------|---------------|---|--------------------------|---------------------|
| Mouse   | MyoG          | F | GAGACATCCCCCTATTTCTACCA  | 60                  |
|         |               | R | GCTCAGTCCGCTCATAGCC      | 60                  |
| Mouse   | Myh3          | F | GAGGAGGCTGATGAACAAGC     | 60                  |
|         |               | R | TCCGGCTAGAGGTGAAGTCG     | 60                  |
| Mouse   | ER $\alpha$   | F | TCTGCCAAGGAGACTCGCTACT   | 60                  |
|         |               | R | GGTGCATTGGTTTGTAGCTGGAC  | 60                  |
| Mouse   | NRF1          | F | GGCAACAGTAGCCACATTGGCT   | 60                  |
|         |               | R | GTCTGGATGGTCATTTACCGC    | 60                  |
| Mouse   | PGC1 $\alpha$ | F | GAATCAAGCCACTACAGACACCG  | 60                  |
|         |               | R | CATCCCTCTTGAGCCTTTCGTG   | 60                  |
| Mouse   | TFAM          | F | GAGGCAAAGGATGATTCGGCTC   | 60                  |
|         |               | R | CGAATCCTATCATCTTTAGCAAGC | 60                  |
| Mouse   | GAPDH         | F | TCAATGAAGGGGTCGTTGAT     | 60                  |
|         |               | R | CGTCCCGTAGACAAAATGGT     | 60                  |

**Table S2. Antibodies for immunoblot & immunofluorescence.**

| Antibody | Source     | Catalog No. |
|----------|------------|-------------|
| Myh3     | Santa Cruz | SC-53091    |

|                   |                |            |
|-------------------|----------------|------------|
| MyoG              | Invitrogen     | MA5-11486  |
| Cleaved Caspase 3 | Cell signaling | 9664       |
| PARP              | Cell signaling | 9542       |
| Tubulin           | Abcam          | Ab7291     |
| NRF1              | Proteintech    | 12482-1-AP |
| TFAM              | Proteintech    | 22586-1-AP |
| Laminin           | Abcam          | Ab11575    |
| GAPDH             | Cell signaling | 2188       |
| MFN1              | Proteintech    | 13798-1-AP |
| MFN2              | Proteintech    | 12186-1-AP |
| FIS1              | Proteintech    | 10956-1-AP |
| DRP1              | Abcam          | Ab154879   |

**Table S3. Normality distribution (Rotarod test and Inverted screen test).**

| Tests of Normality   |              |                                 |    |       |              |    |      |
|----------------------|--------------|---------------------------------|----|-------|--------------|----|------|
| grp                  |              | Kolmogorov-Smirnov <sup>a</sup> |    |       | Shapiro-Wilk |    |      |
|                      |              | Statistic                       | df | Sig.  | Statistic    | df | Sig. |
| Rotarod test         | 1 sham       | .158                            | 10 | .200* | .947         | 10 | .637 |
|                      | 2 OVX        | .156                            | 10 | .200* | .907         | 10 | .262 |
|                      | 3 OVX+PNF100 | .177                            | 10 | .200* | .948         | 10 | .644 |
|                      | 4 OVX+PNF300 | .177                            | 10 | .200* | .897         | 10 | .201 |
|                      | 5 OVX+E2     | .194                            | 10 | .200* | .965         | 10 | .842 |
| Inverted screen test | 1 sham       | .251                            | 10 | .073  | .912         | 10 | .295 |
|                      | 2 OVX        | .189                            | 10 | .200* | .898         | 10 | .209 |
|                      | 3 OVX+PNF100 | .145                            | 10 | .200* | .956         | 10 | .739 |
|                      | 4 OVX+PNF300 | .175                            | 10 | .200* | .934         | 10 | .487 |
|                      | 5 OVX+E2     | .229                            | 10 | .145  | .916         | 10 | .326 |

\*. This is a lower bound of the true significance.

a. Lilliefors Significance Correction

**Table S4. Dunnett's test (Rotarod test and Inverted screen test).**

| Multiple Comparisons             |  |            |      |                         |
|----------------------------------|--|------------|------|-------------------------|
| Dunnett t (2-sided) <sup>a</sup> |  |            |      |                         |
| Dependent Variable               |  | Std. Error | Sig. | 95% Confidence Interval |

|                         |          |       | Mean<br>Difference<br>(I-J) |         |      | Lower<br>Bound | Upper<br>Bound |
|-------------------------|----------|-------|-----------------------------|---------|------|----------------|----------------|
| Rotarod<br>test         | 2 sham   | 1 OVX | 49.80000*                   | 6.62490 | .000 | 33.0304        | 66.5696        |
|                         | 3 PNF100 | 1 OVX | 15.90000                    | 6.62490 | .068 | -.8696         | 32.6696        |
|                         | 4 PNF300 | 1 OVX | 33.50000*                   | 6.62490 | .000 | 16.7304        | 50.2696        |
|                         | 5 E2     | 1 OVX | 24.60000*                   | 6.62490 | .002 | 7.8304         | 41.3696        |
| Inverted<br>screen test | 2 sham   | 1 OVX | 43.10000*                   | 7.74031 | .000 | 23.5069        | 62.6931        |
|                         | 3 PNF100 | 1 OVX | 15.30000                    | 7.74031 | .165 | -4.2931        | 34.8931        |
|                         | 4 PNF300 | 1 OVX | 26.40000*                   | 7.74031 | .005 | 6.8069         | 45.9931        |
|                         | 5 E2     | 1 OVX | 21.40000*                   | 7.74031 | .028 | 1.8069         | 40.9931        |

\*. The mean difference is significant at the 0.05 level.

a. Dunnett t-tests treat one group as a control, and compare all other groups against it.

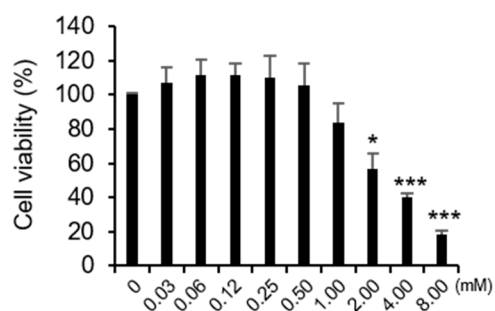

**Figure S1.** Effects of PNF on the viability of primary differentiated myoblast cells treated with the indicated concentrations for 72 h. (n=3). \* $p < 0.05$ , \*\* $p < 0.01$ , and \*\*\* $p < 0.001$ .

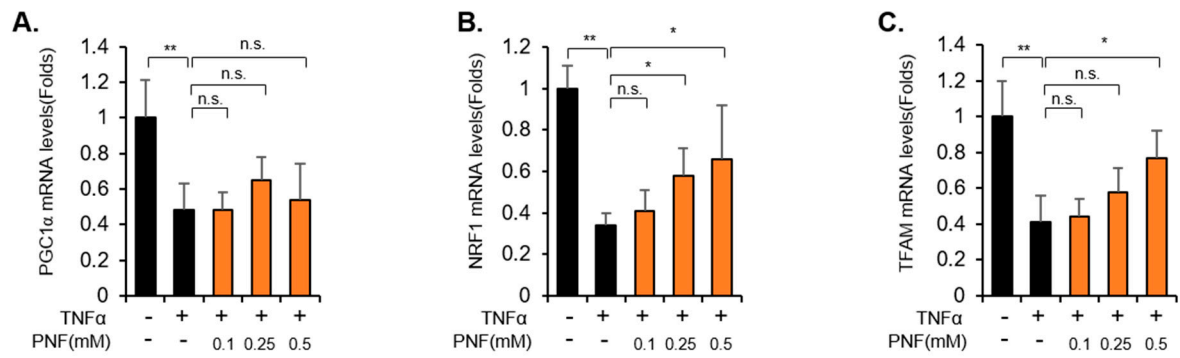

**Figure S2.** PNF selectively recovers the TNF $\alpha$ -induced reduction of NRF1 and TFAM transcripts, but not PGC1 $\alpha$  in C2C12 cells. TNF $\alpha$  (10 ng/ml), PNF was treated in cells for 24 hours. (A) PGC1 $\alpha$ , (B) NRF1, (C) TFAM. \* $p < 0.05$ , \*\* $p < 0.01$ , \*\*\* $p < 0.001$ . N.S., not significant.
